CORRECTION

# Correction: Sex-specific associations of adiposity with cardiometabolic traits in the UK: A multi-life stage cohort study with repeat metabolomics

Linda M. O’Keeffe, Joshua A. Bell, Kate N. O’Neill, Matthew A. Lee, Mark Woodward, Sanne A. E. Peters, George Davey Smith, Patricia M. Kearney

In the Funding statement, the grant number from the funder The Wellcome Trust is listed incorrectly. The correct grant number is: 092731/Z/10/Z.

## Reference

1. O’Keeffe LM, Bell JA, O’Neill KN, Lee MA, Woodward M, Peters SAE, et al. Sex-specific associations of adiposity with cardiometabolic traits in the UK: A multi-life stage cohort study with repeat metabolomics. PLoS Med. 2022;19(1):e1003636. <https://doi.org/10.1371/journal.pmed.1003636> PMID: [34990449](https://pubmed.ncbi.nlm.nih.gov/34990449/)

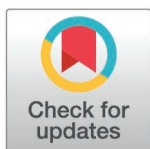

## OPEN ACCESS

**Citation:** O’Keeffe LM, Bell JA, O’Neill KN, Lee MA, Woodward M, Peters SAE, et al. (2026) Correction: Sex-specific associations of adiposity with cardiometabolic traits in the UK: A multi-life stage cohort study with repeat metabolomics. PLoS Med 23(1): e1004901. <https://doi.org/10.1371/journal.pmed.1004901>

**Published:** January 23, 2026

**Copyright:** © 2026 O’Keeffe et al. This is an open access article distributed under the terms of the [Creative Commons Attribution License](https://creativecommons.org/licenses/by/4.0/), which permits unrestricted use, distribution, and reproduction in any medium, provided the original author and source are credited.
